# Supplementary material for: Creation of a Tool to Evaluate Supportive Care: Experiences from Socioesthetics
Source: Research Square preprint supplement (doi:10.21203/rs.3.rs-1034649/v1), 2021-12-08

**Additional Data : US version**

For each of the following statements, please rate your feelings as spontaneously as possible by marking a vertical line from 0 for “No, not at all” to 10 for “Yes, all the time.”

If you think a statement does not apply to you, mark your line on the zero.

Currently, I feel like I’m happy again.


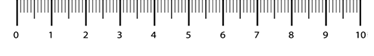


Currently, I feel like I have a positive outlook.


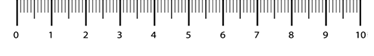


Currently, I feel at peace.


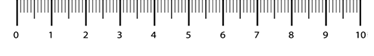


Currently, I am enjoying taking care of myself.


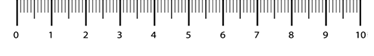


Currently, I feel in tune with myself.


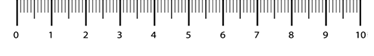


Currently, I know how to reflect my best self.


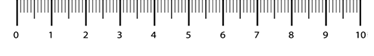


Currently, I feel like I’m taking better care of myself.


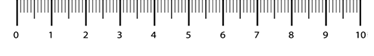


Currently, I feel listened to.


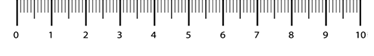


Currently, I feel like I am actively involved in the management of my care.


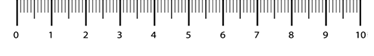


Currently, I feel like I’ve learned to take better care of myself.


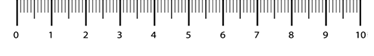


Currently, I feel like I am motivated to fight against my illness.


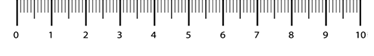


**Additional Data :** French version

Pour chacune des affirmations suivantes, évaluez le plus spontanément possible votre ressenti en plaçant un trait vertical de 0 pour « non pas du tout » à 10 pour « oui en permanence ».

Si vous pensez ne pas être concerné(e) par une affirmation, placez votre trait sur le zéro.

Actuellement, j'ai le sentiment d'avoir retrouvé le sourire


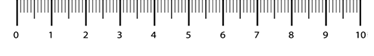


Actuellement, j'ai le sentiment d'avoir bon moral


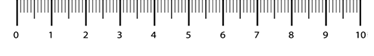


Actuellement, je me sens en paix


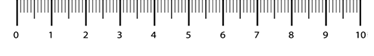


Actuellement, j'ai plaisir à prendre soin de moi


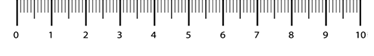


Actuellement, je me sens en phase avec moi


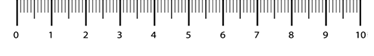


Actuellement, je sais me mettre à mon avantage


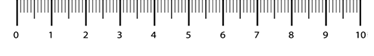


Actuellement, j'ai le sentiment de mieux prendre soin de moi


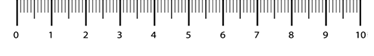


Actuellement, je me sens écouté(e)


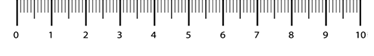


Actuellement, j'ai le sentiment d'être acteur (actrice) de mon parcours de soin


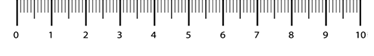


Actuellement, j'ai le sentiment d'avoir appris à mieux m'occuper de moi


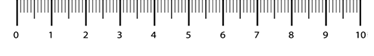


Actuellement, j'ai le sentiment d'être combatif(ve) face à la maladie


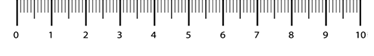

Supplement: Supplementary file 1 [file dedcbfe930f71a0cdc96e84d.docx]
